# Supplementary material for: A novel domain within the CIL regulates egress of IFITM3 from the Golgi and prevents its deleterious accumulation in this apparatus
Source: bioRxiv or medRxiv preprint supplement (doi:10.1101/2021.03.29.437470), 2021-03-29

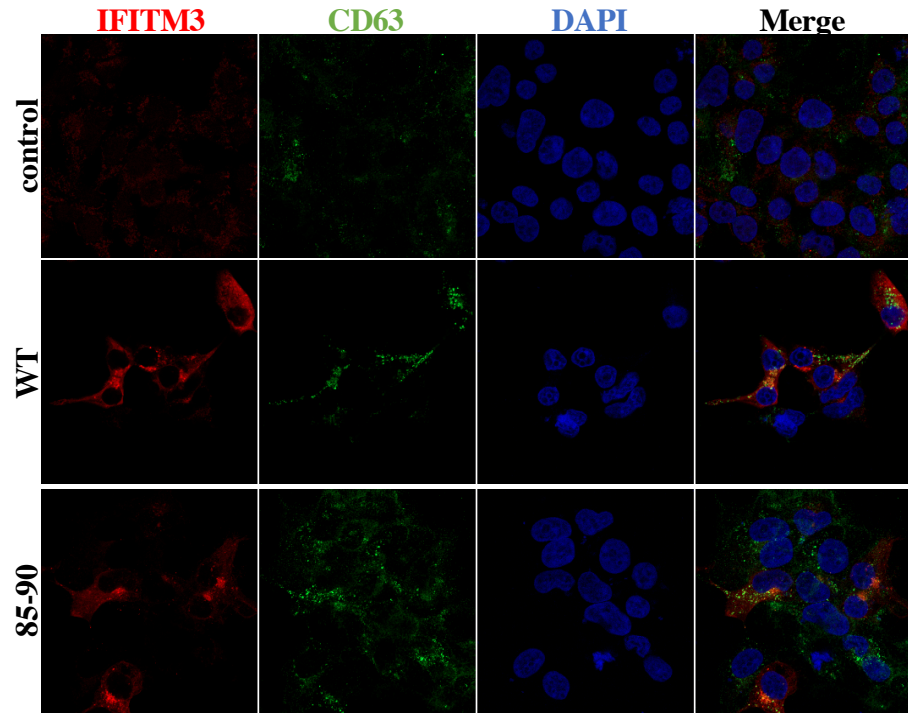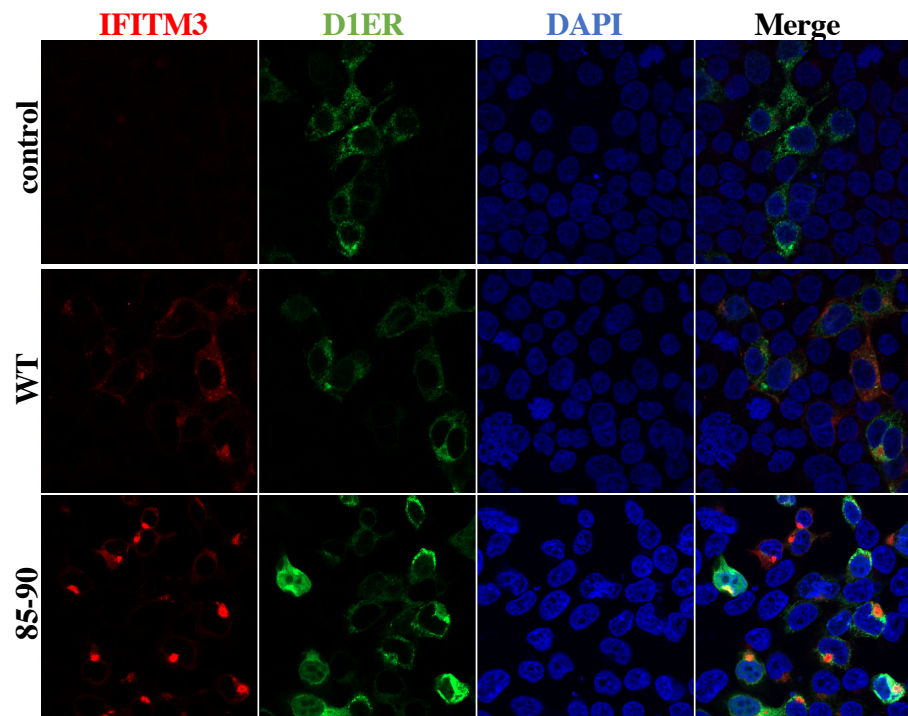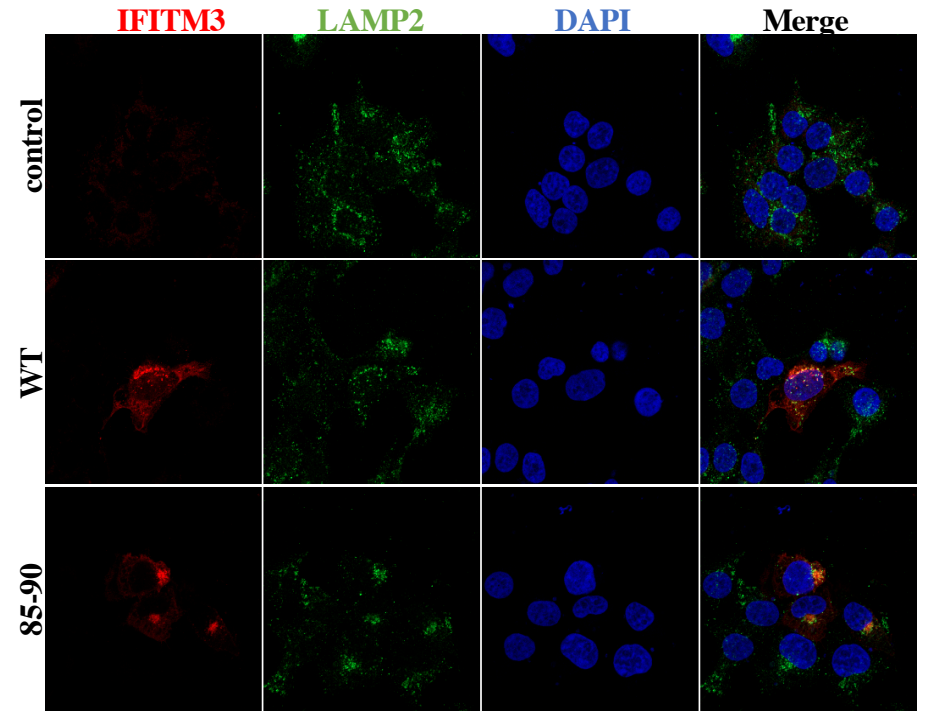

— 20  $\mu$ m

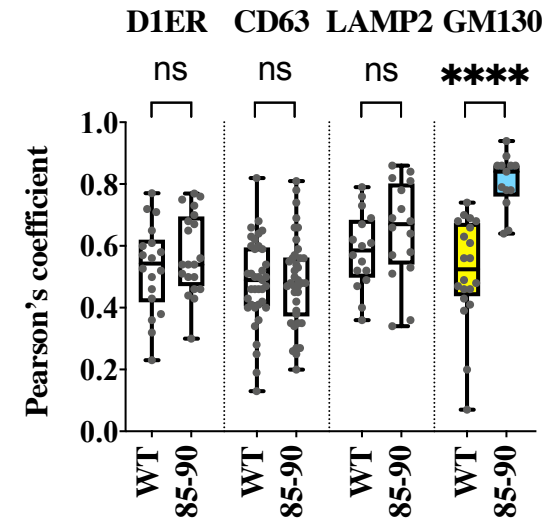

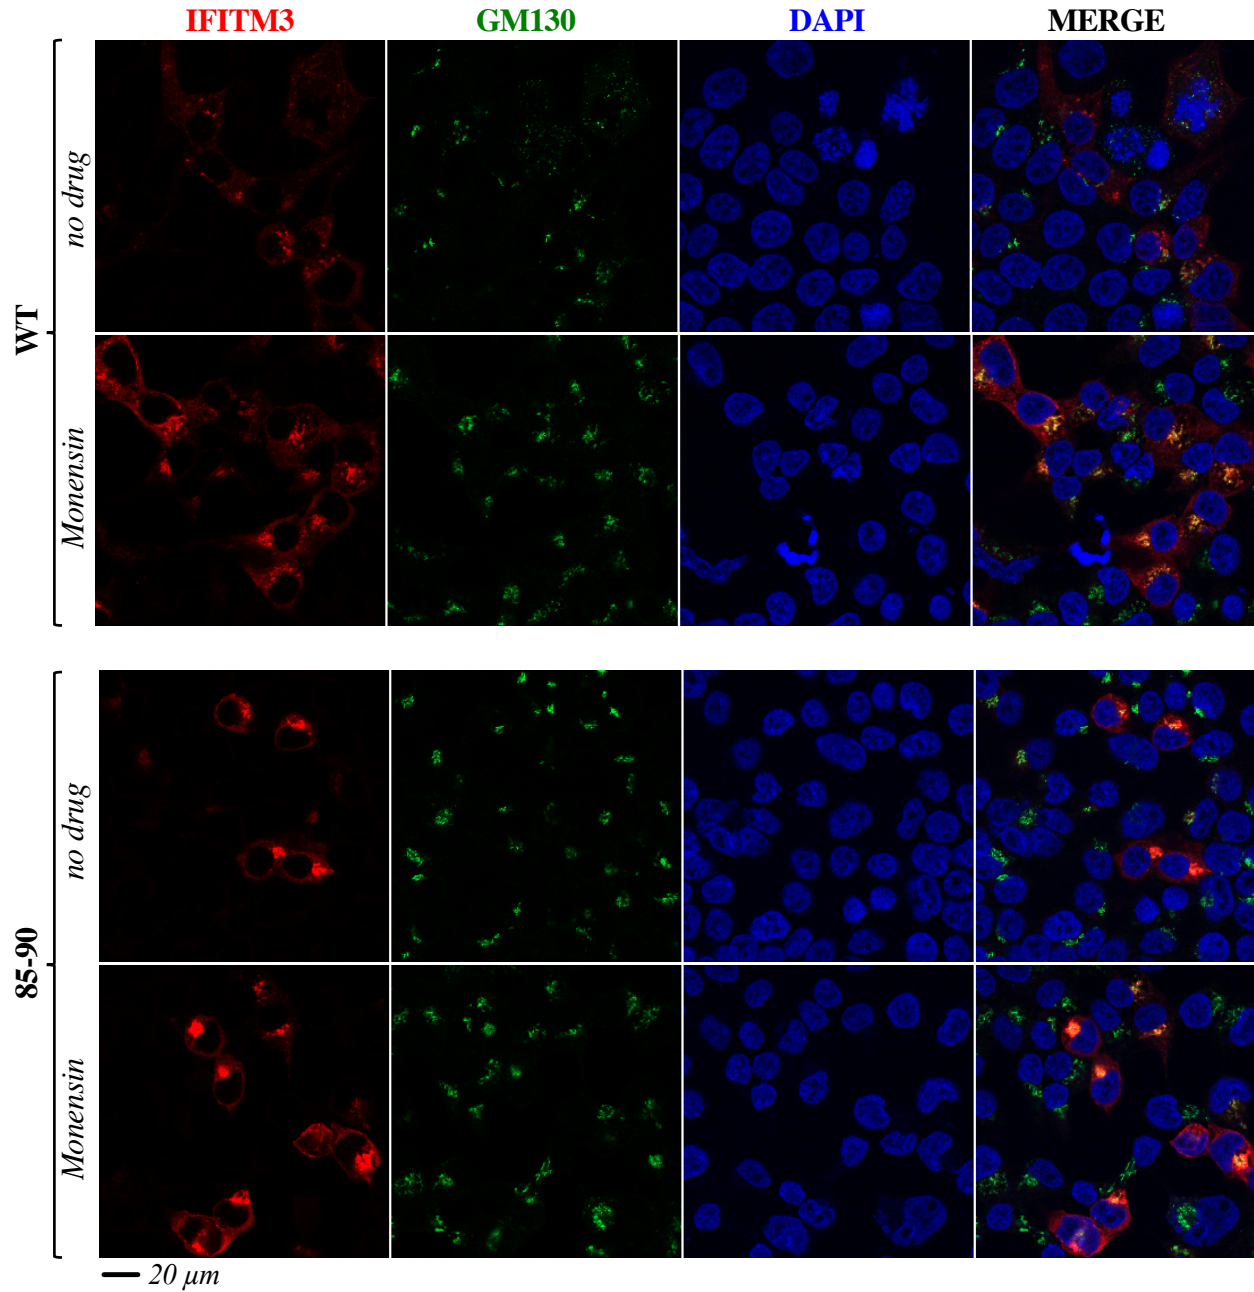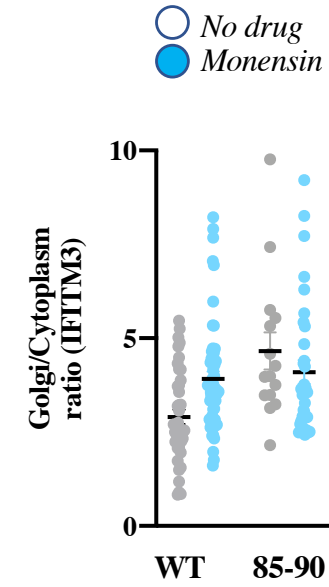

|                | WT<br>Monensin | 85-90<br>Monensin |
|----------------|----------------|-------------------|
| WT no drug     | **             | **                |
| 85-90 no drug  | ns             | ns                |
| WT Monensin    |                | ns                |
| 85-90 Monensin | ns             |                   |

*one-way Anova, Tukey's multiple comparison test*

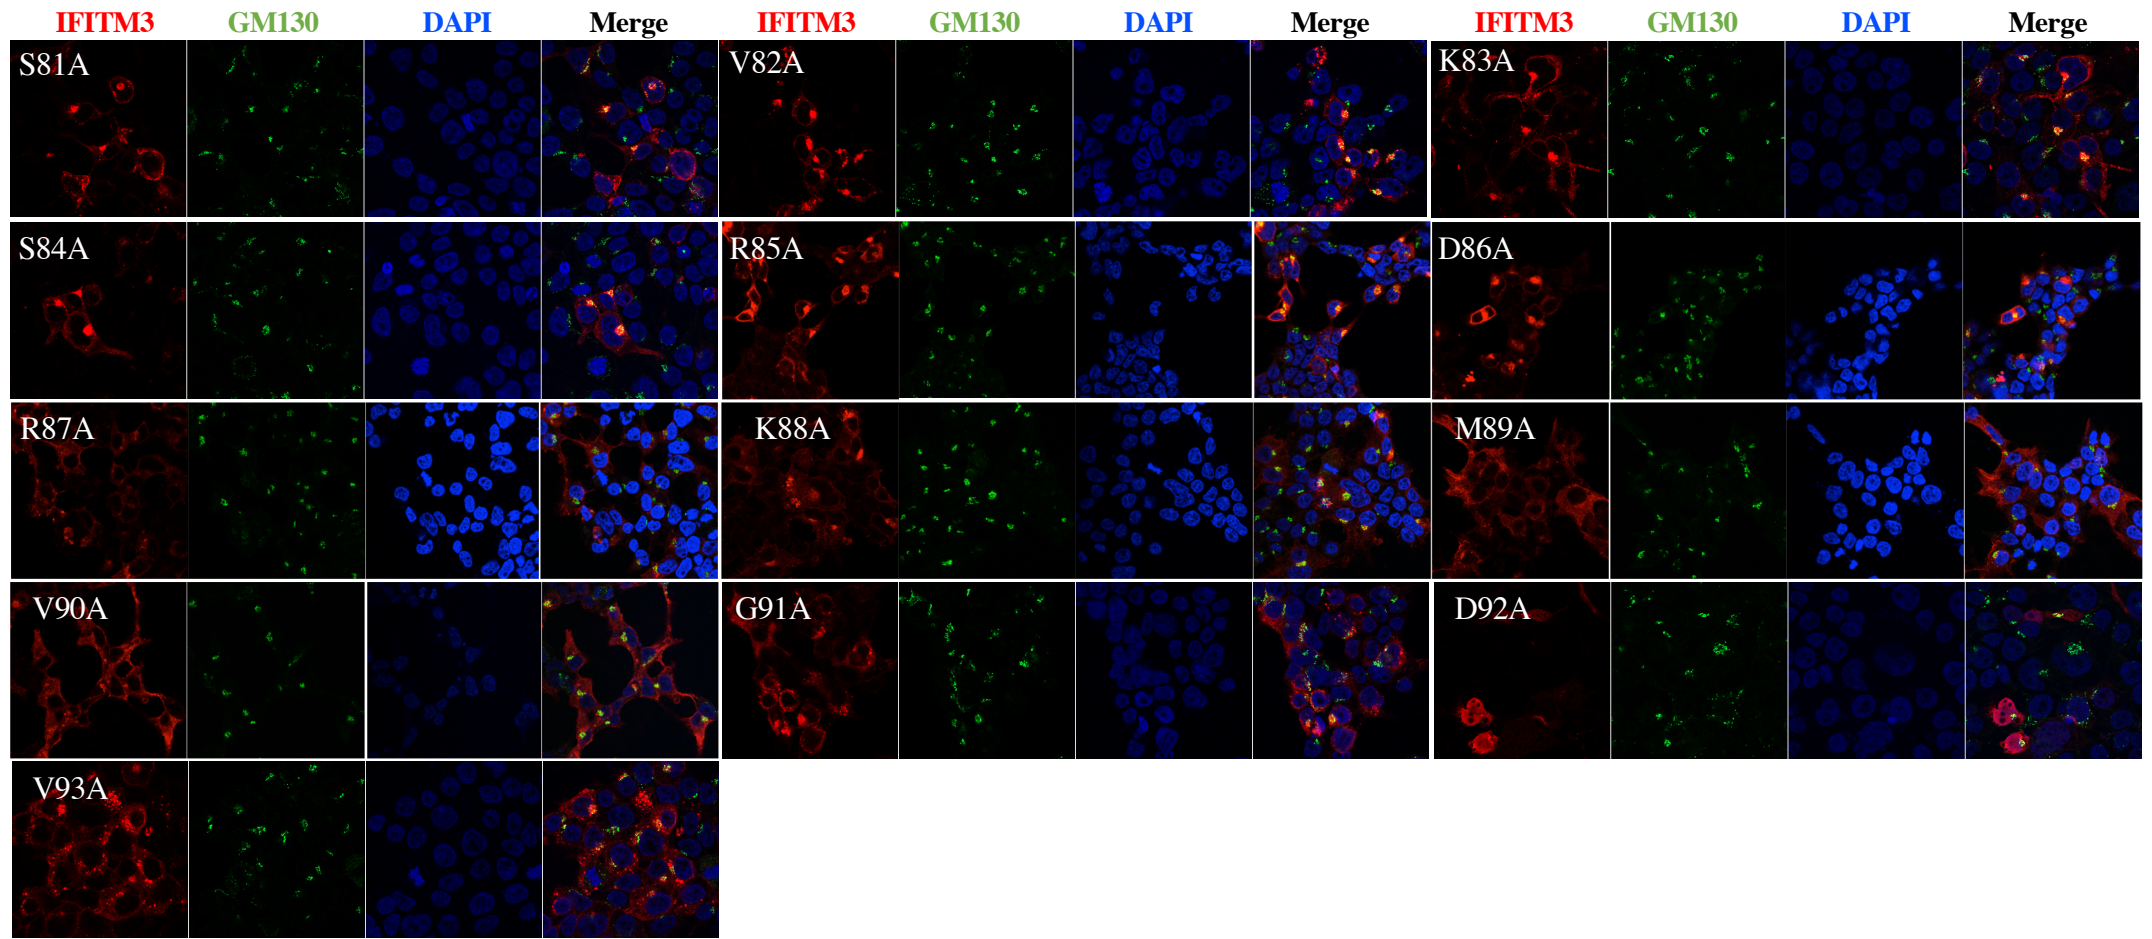

— 20  $\mu$ m

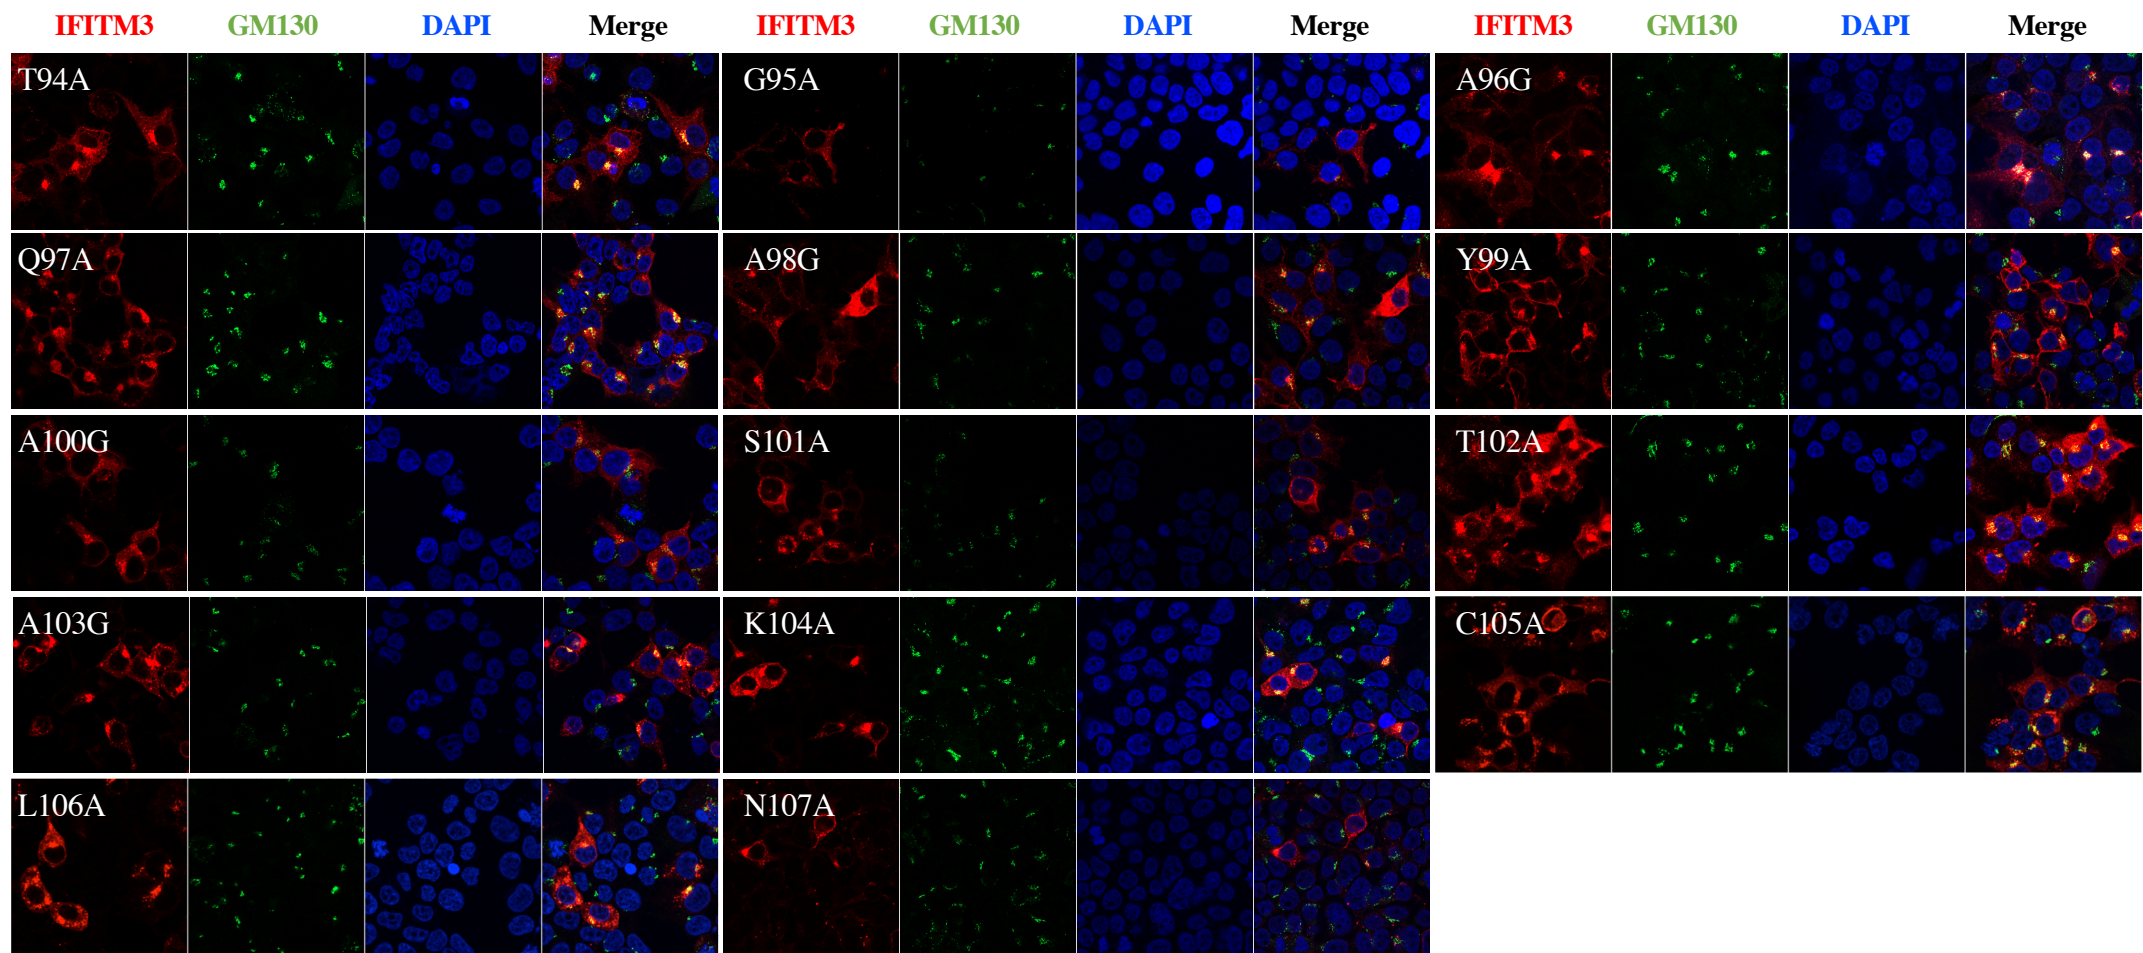

— 20  $\mu$ m

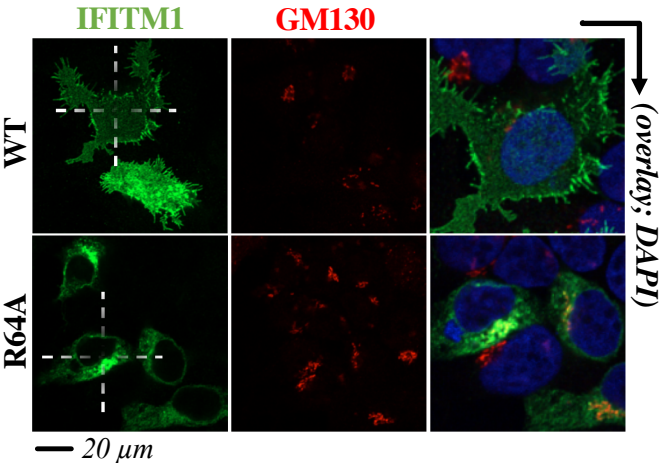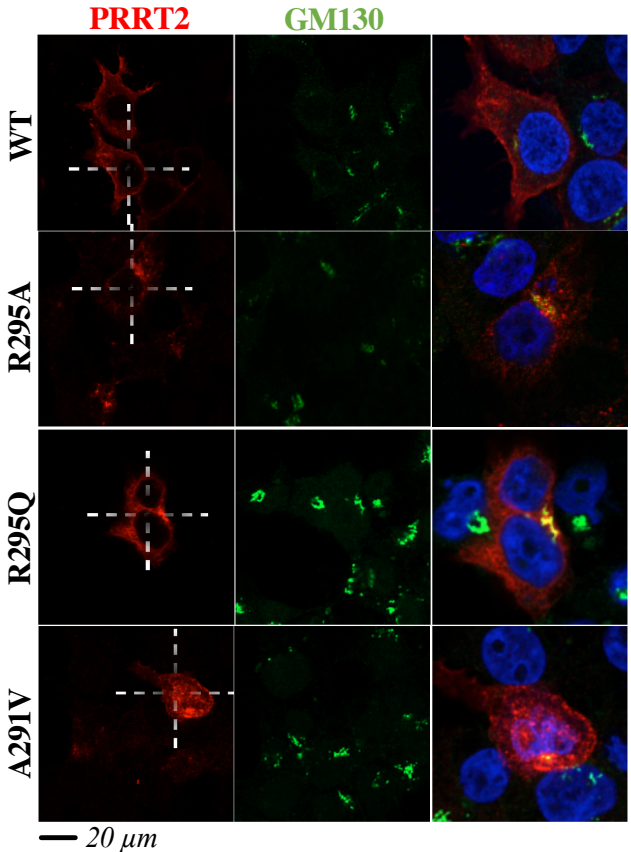

Supplement: Supplementary file [file media-1.pdf]
